# Supplementary material
Source: Springer Nature journal article supplement (https://www.springermedizin.de/resource/supplementary/12885_2012_3917_MOESM4_ESM.pdf/9464680)

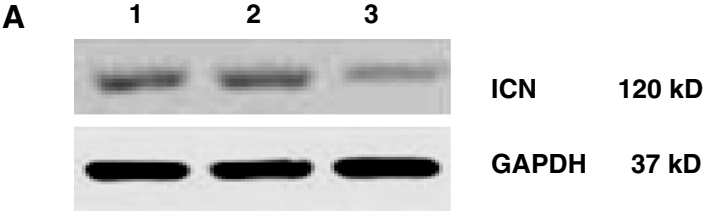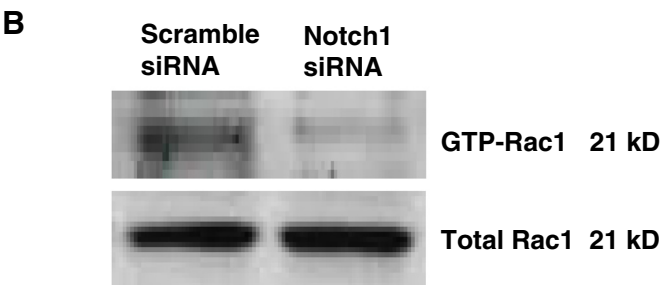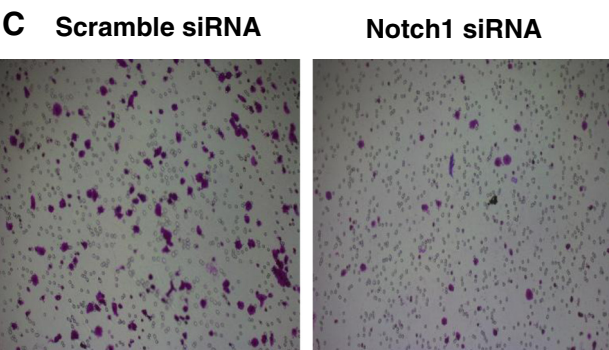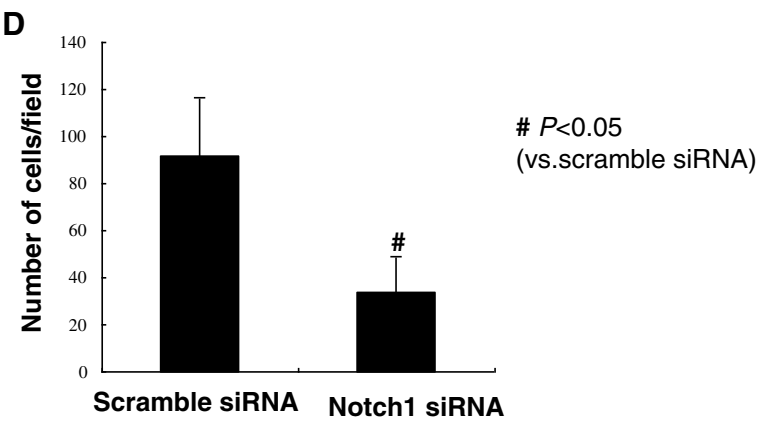

Supplement: MOESM4 [file 9464680]
